# Supplementary material for: MOF-based heterogeneous catalysis in continuous flow via incorporation onto polymer-based spherical activated carbon supports
Source: Royal Society of Chemistry journal article supplement (doi:10.1039/d3nr03634k), 2023-01-01
Supplement: d3nr03634k1.pdf [file d3nr03634k1.pdf]

Supplementary Information for

MOF-based heterogeneous catalysis in continuous flow via.  
incorporation onto polymer based spherical activated carbon  
supports

Anthony Griffiths, <sup>a</sup> Sarah L. Boyall, <sup>a</sup> Pia Müller, <sup>a</sup> John P. Harrington, <sup>b</sup> Anna M. Sobolewska, <sup>c</sup> William R. Reynolds, <sup>c</sup> Richard A. Bourne, <sup>a,d</sup> Kejun Wu, <sup>e</sup> Sean M. Collins, <sup>d</sup> Mark Muldowney <sup>c</sup> and Thomas W. Chamberlain <sup>\*a</sup>

<sup>a</sup> Institute of Process Research and Development, School of Chemistry, School of Chemical and Process Engineering, University of Leeds, Leeds, UK

<sup>b</sup> Leeds Electron Microscopy And Spectroscopy centre, LEMAS, Bragg Centre for Materials Research, University of Leeds, Leeds, LS2 9JT.

<sup>c</sup> Sterling Pharma Solutions Limited, Dudley, Cramlington, Northumberland NE23 7QG, U.K.

<sup>d</sup> School of Chemical and Process Engineering and School of Chemistry, University of Leeds, Leeds, LS2 9JT UK

<sup>e</sup> Zhejiang Provincial Key Laboratory of Advanced Chemical Engineering Manufacture Technology, College of Chemical and Biological Engineering, Zhejiang University, Hangzhou 310027, P. R. China; Institute of Zhejiang University-Quzhou, Quzhou 324000, P. R. China;

\* E-mail: T.W.Chamberlain@Leeds.ac.uk; Fax: +44 (0)113 432215

## Contents

|                                                                                                |    |
|------------------------------------------------------------------------------------------------|----|
| Contents .....                                                                                 | 2  |
| 1.1 Flow setup .....                                                                           | 3  |
| 1.2 Gas chromatography analysis.....                                                           | 5  |
| 1.3 TGA profiles of PBSAC-trimesic acid control and trimesic acid .....                        | 7  |
| 1.4 PXRD pattern of loose powdered MIL-100(Sc) formed during MIL-100(Sc)@PBSAC synthesis ..... | 8  |
| 1.5 SEM-EDX images of unfunctionalised PBSAC spheres .....                                     | 9  |
| 1.6 SEM-EDX of MIL-100(Sc)@PBSAC composites.....                                               | 10 |
| 1.7 Calculation of MIL-100(Sc) stoichiometry and loading onto PBSAC spheres by TGA .....       | 11 |
| 1.7.1 Calculation of MIL-100(Sc) stoichiometry.....                                            | 11 |
| 1.7.2 Calculation of MIL-100(Sc) loading onto PBSAC spheres.....                               | 12 |
| 1.8 TGA derivative weight loss plot .....                                                      | 14 |
| 1.9 Volume size distribution of PBSAC spheres .....                                            | 15 |
| 2.0 Calculation of reaction metrics.....                                                       | 16 |
| 2.1 Characterisation of MIL-100(Sc)@PBSAC after 26 hours on stream .....                       | 18 |
| 2.1.1 Atomic absorption spectroscopy (AAS) .....                                               | 18 |
| 2.1.2 Scanning electron microscopy–energy dispersive X-ray analysis (SEM-EDX) .....            | 18 |

## 1.1 Flow setup

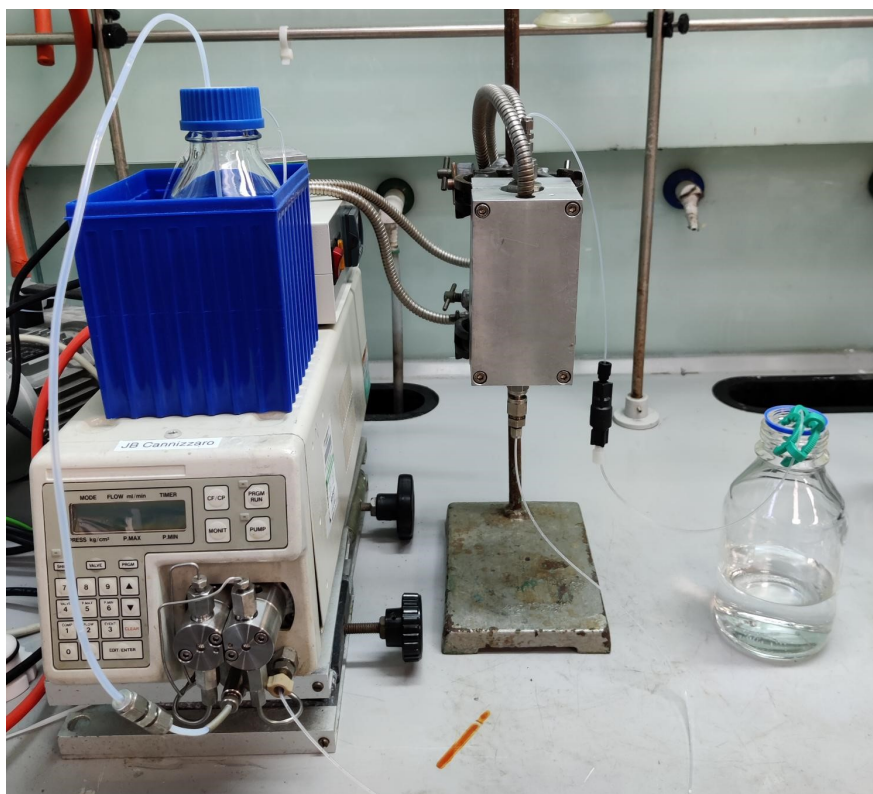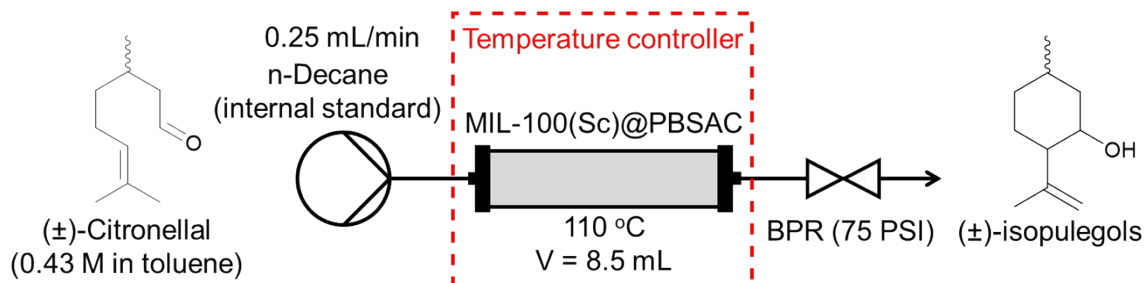

Figure S1 1: Flow setup used in this work.

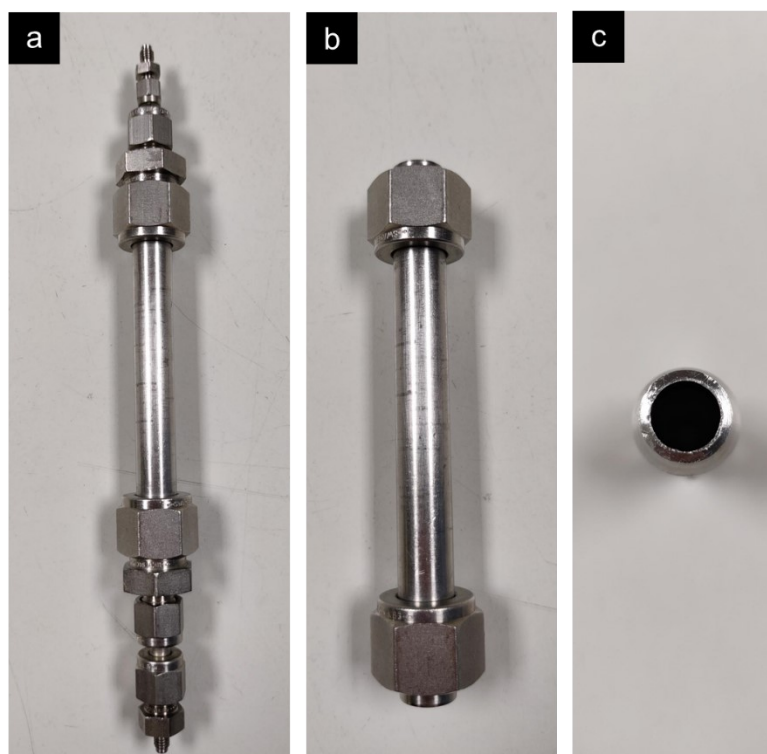

*Figure SI 2: a) Packed-bed reactor used in this work with adapters connected. b) Packed-bed reactor used in this work without adapters connected. c) Top-view of packed-bed reactor used in this work.*

## 1.2 Gas chromatography analysis

Table 1: GC method used for off-line experiment analysis

|                      |                                                                       |
|----------------------|-----------------------------------------------------------------------|
| Column               | DB-624 (Length: 30 m, Diameter: 0.25 m, Film Thickness: 1.40 $\mu$ m) |
| Injection Volume     | 1 $\mu$ L                                                             |
| Inlet Temperature    | 250 $^{\circ}$ C                                                      |
| Detector Temperature | 300 $^{\circ}$ C                                                      |
| Split Ratio          | 25:1                                                                  |
| Detection            | FID                                                                   |

Table 2: Temperature program used for off-line GC chromatography.

| Oven    | Rate ( $^{\circ}$ C/min) | Value ( $^{\circ}$ C) | Hold Time (mins) | Run Time (mins) |
|---------|--------------------------|-----------------------|------------------|-----------------|
| Initial |                          | 40                    | 1                | 1               |
| Ramp 1  | 25                       | 180                   | 1                | 7.6             |
| Ramp 2  | 2.5                      | 190                   | 1                | 12.6            |
| Ramp 3  | 20                       | 200                   | 0                | 13.1            |

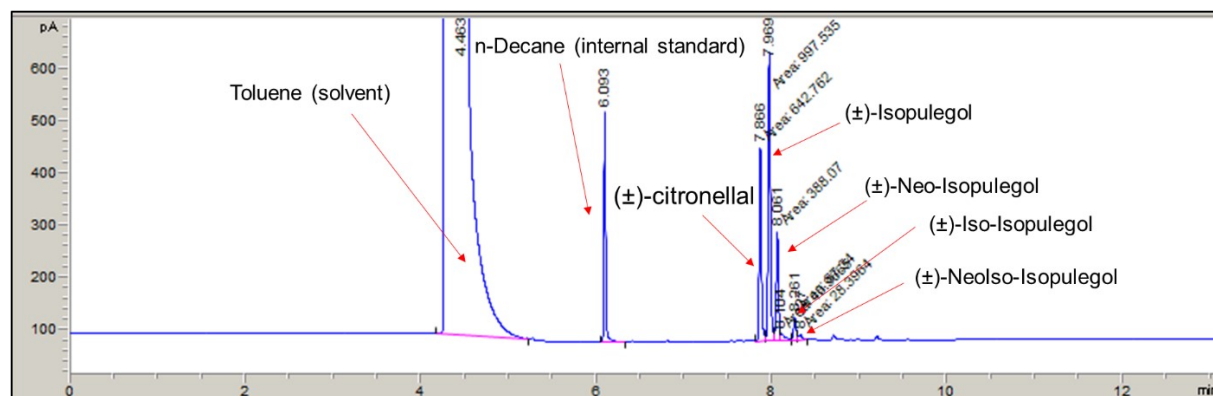

Figure SI 3: Example of typical GC chromatogram obtained in this work, the figure above was obtained after five hours.

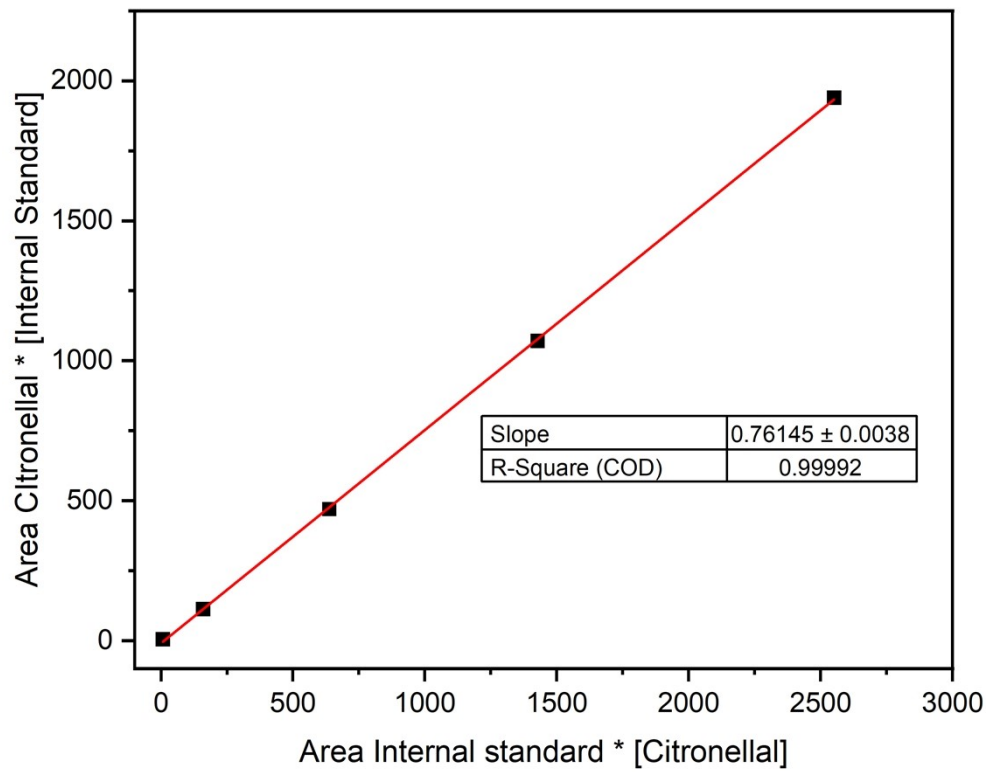

Figure SI 4: Calibration curve of ( $\pm$ )-citronellal and response factor (slope).

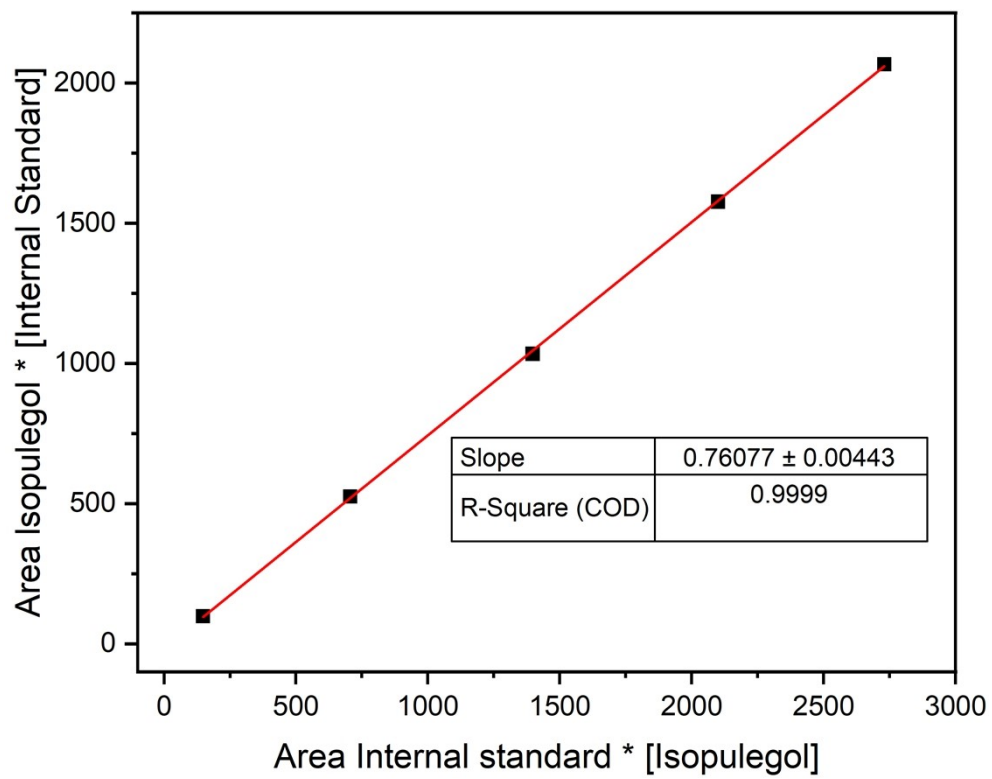

Figure SI 5: Calibration curve of Isopulegol and response factor (slope).

### 1.3 TGA profiles of PBSAC-trimesic acid control and trimesic acid

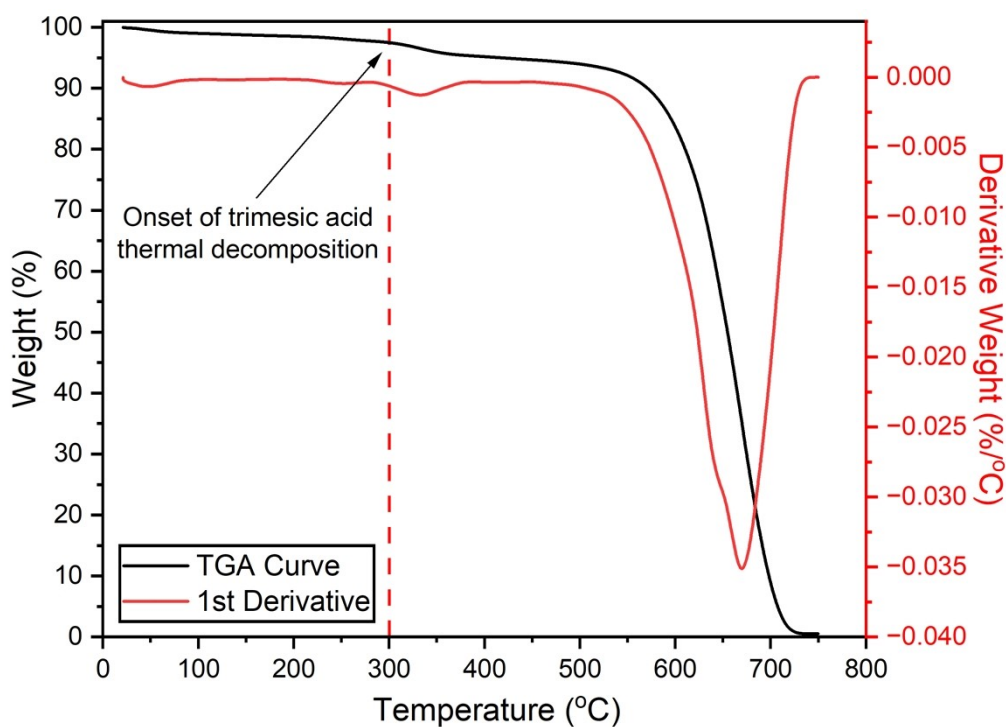

Figure SI 6: TGA profile of PBSAC-trimesic acid control sample. There is a small weight loss beginning at approximately 300 °C corresponding to the thermal decomposition of adsorbed trimesic acid.

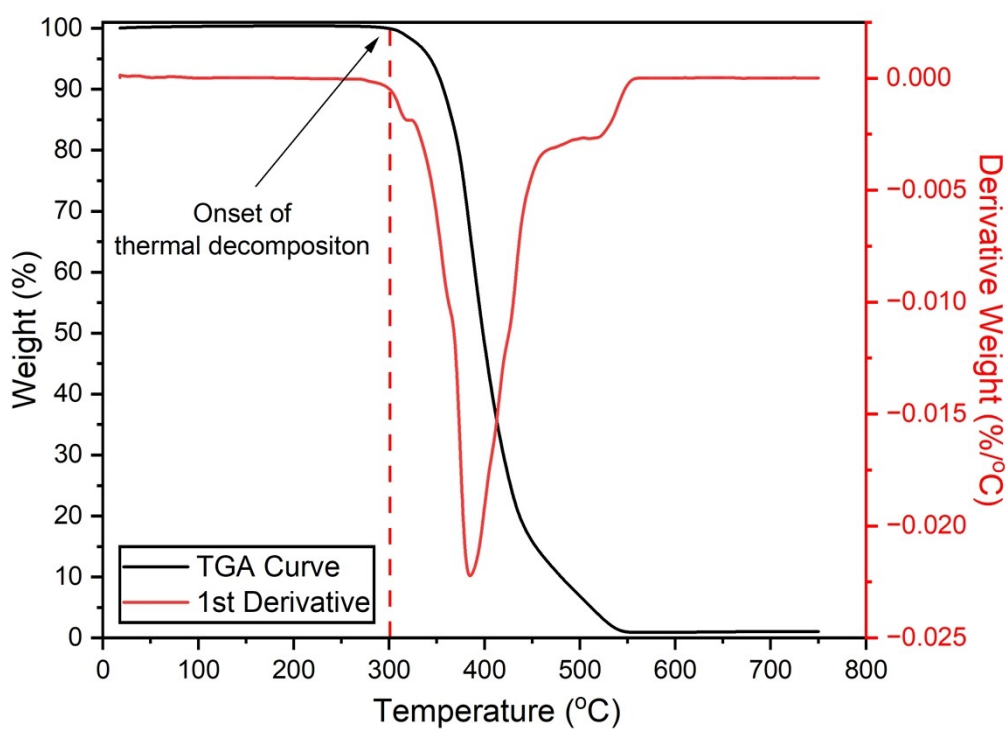

Figure SI 7: TGA profile of trimesic acid. Thermal decomposition begins to occur at approximately 300 °C.

1.4 PXRD pattern of loose powdered MIL-100(Sc) formed during MIL-100(Sc)@PBSAC synthesis

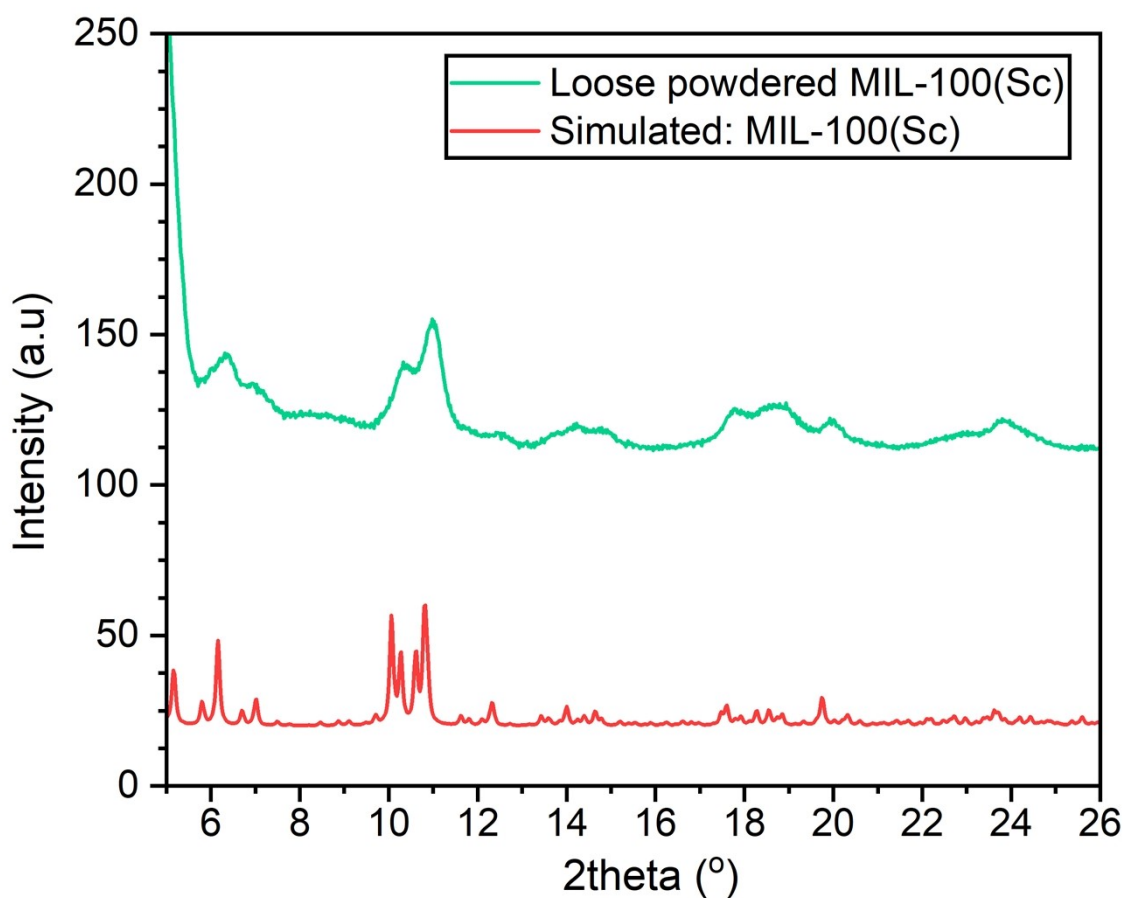

Figure SI 8: PXRD pattern of loose powdered MIL-100(Sc) (green) that was formed in the reaction vessel during MIL-100(Sc)@PBSAC synthesis compared with the simulated pattern of MIL-100(Sc). The data was acquired on a D2 Phaser (Bruker).



## 1.5 SEM-EDX images of unfunctionalised PBSAC spheres

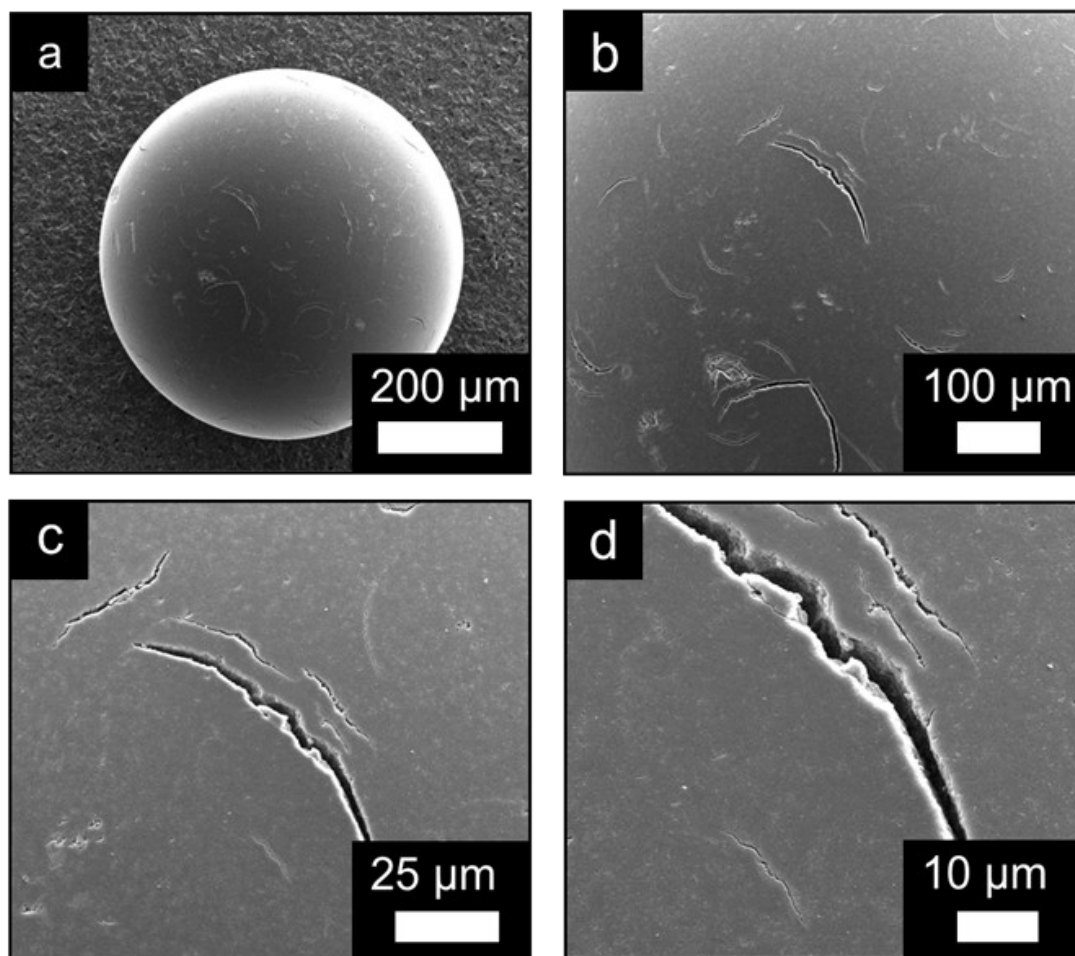

Figure SI 9: SEM images of a PBSAC bead showing; a) the whole bead and (b-d) a crack located on surface of a PBSAC bead (all images, detector: ETD, mode: SE).

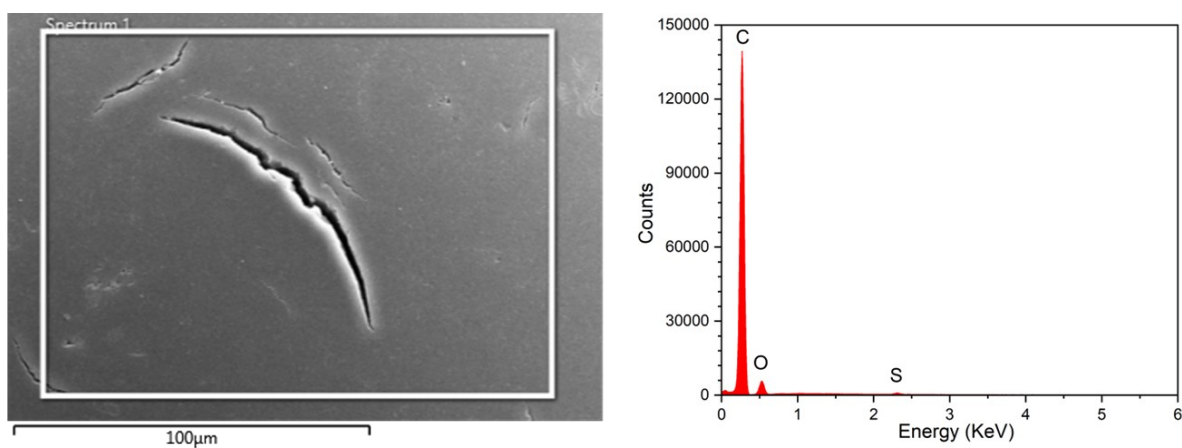

Figure SI 10: Left: Region of PBSAC sphere where EDX spectra was obtained. Right: Resultant EDX spectra, unfunctionalised PBSAC spheres contain carbon, oxygen and small amounts of sulphur (which may be attributed to the presence of residues from the initial polymer bead synthesis).

## 1.6 SEM-EDX of MIL-100(Sc)@PBSAC composites

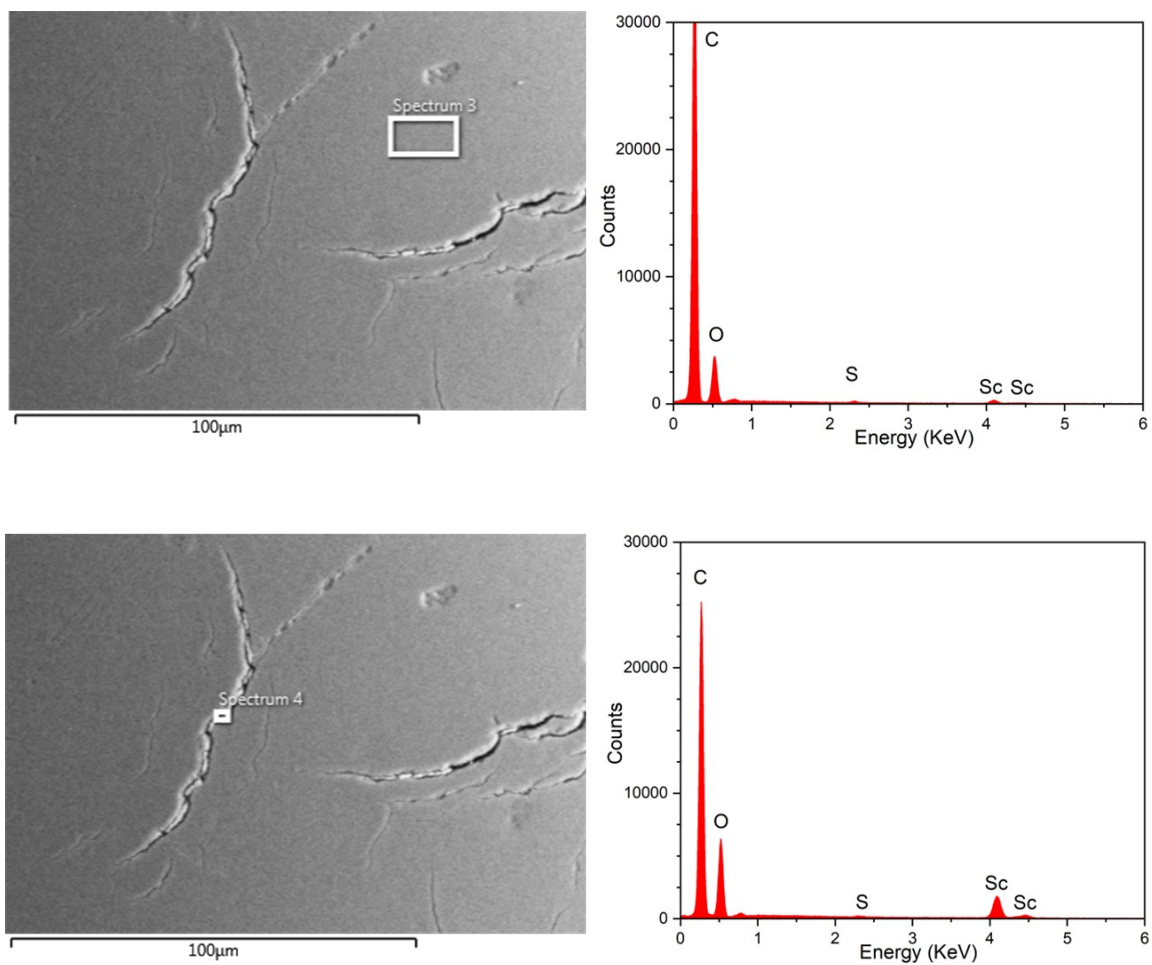

Figure SI 11: Left: SEM image of a MIL-100(Sc)@PBSAC sphere with the region where EDX spectra was obtained highlighted. Right: Resultant EDX spectra.

## 1.7 Calculation of MIL-100(Sc) stoichiometry and loading onto PBSAC spheres by TGA

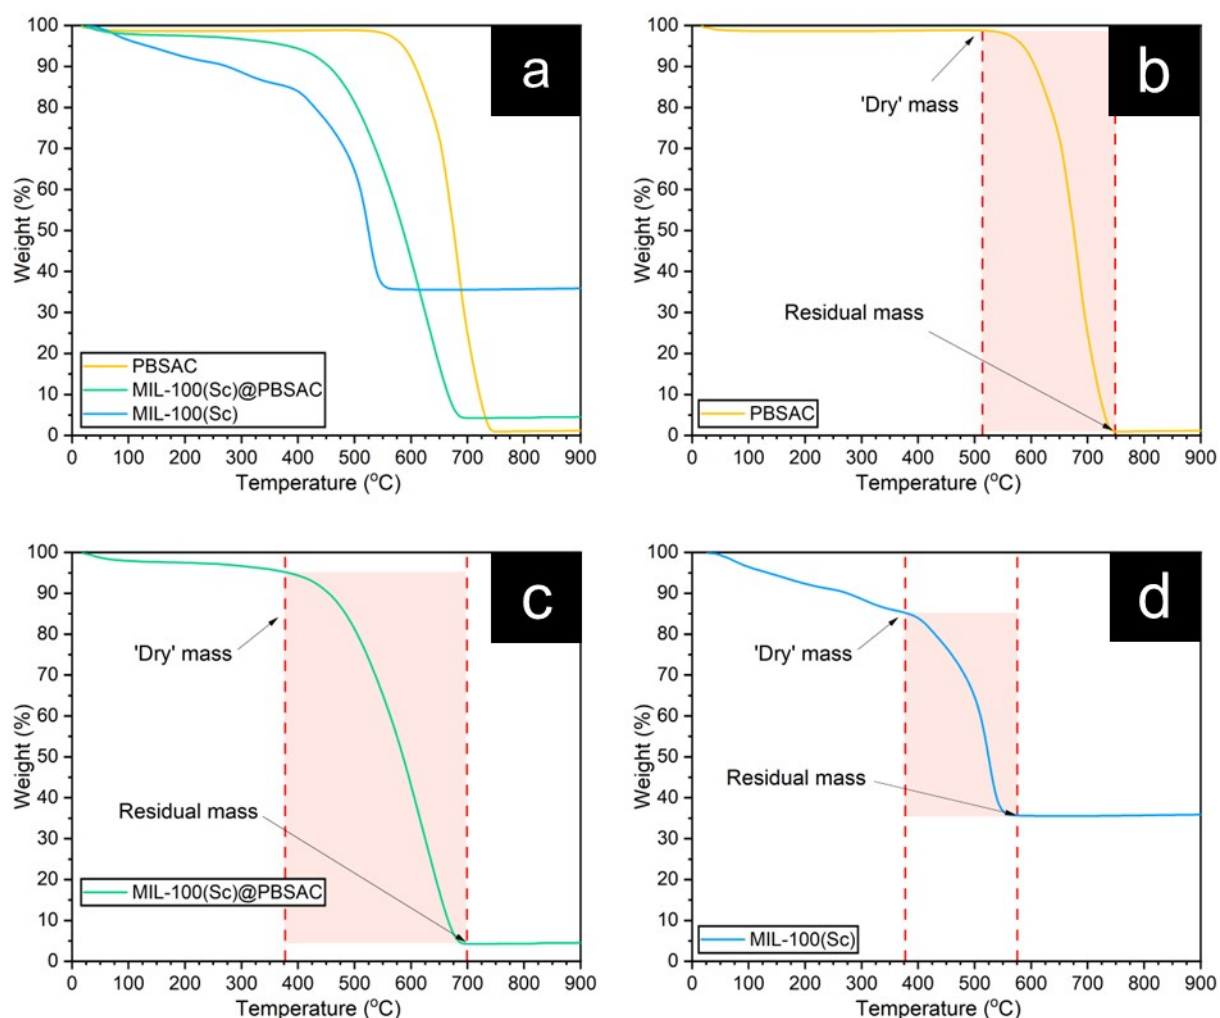

Figure SI 12: a) TGA profiles of PBSAC spheres (yellow), MIL-100(Sc)@PBSAC (green) and MIL-100(Sc) (blue). b) TGA profile of PBSAC spheres showing the dry mass ( $\approx 515$  °C) and residual mass following framework decomposition at  $\approx 740$  °C. c) TGA profile of MIL-100(Sc)@PBSAC showing the dry mass ( $\approx 380$  °C) and residual mass following framework decomposition at  $\approx 700$  °C. d) TGA profile of MIL-100(Sc) showing the dry mass ( $\approx 380$  °C) and residual mass following framework decomposition at  $\approx 580$  °C.

### 1.7.1 Calculation of MIL-100(Sc) stoichiometry

In the TGA profile of powdered, reflux prepared MIL-100(Sc) (Figure 8 c), the residual mass (e.g. following framework decomposition at 700 °C) corresponds to  $\text{Sc}_2\text{O}_3$  and thus allows for determination of the stoichiometry of this framework. By mass, scandium oxide ( $\text{Sc}_2\text{O}_3$ ) is 65.2 % scandium, thus of the 3.61 mg residual mass in an experiment involving 10.17 mg MIL-100(Sc), 2.35 mg was scandium (Equation 1).

$$\text{Mass of scandium in MIL - 100 (Sc) (mg)} = \frac{3.61 \text{ mg}}{100} \times 65.2 = 2.35 \text{ mg} \quad (\text{Equation 1})$$

The residual mass as a percentage of the 'dry' mass (i.e. the mass following solvent removal but before structure thermal decomposition, e.g. at  $\approx 380$  °C in the TGA profile of MIL-100(Sc), Figure 8 c) was calculated according to equation 2.

$$\text{Residual mass (\%)} = \frac{\text{mass present following material decomposition (mg)}}{\text{'Dry' mass (mg)}} \times 100$$

(Equation 2)

For an experiment involving 10.17 mg MIL-100(Sc), with a 'dry' mass of 8.65 mg (at 380 °C) (Figure 8 c), the residual mass of MIL-100(Sc) was 3.61 mg and so the amount of scandium present was 2.35 mg. Thus, the powdered MIL-100(Sc) was 27.2 % scandium by weight (Equation 3).

$$\text{Residual mass of powdered MIL - 100(Sc)(\%)} = \frac{2.35 \text{ mg}}{8.65 \text{ mg}} = 27.2\%$$

(Equation 3)

The literature reported formula of MIL-100(Sc) is  $[\text{Sc}_3\text{O}(\text{BTC})_2\text{X}]$  (where X = singly charged anion required to balance charge, assumed to be hydroxide  $(\text{OH}^-)$ ) which has a scandium weight percentage of 23.2% w/w, below the calculated value of 27.2% w/w for powdered MIL-100(Sc) in this work. Due to this difference in value, a new stoichiometry of MIL-100(Sc) was calculated, ensuring a neutral framework by balancing the charge with the relevant number of hydroxide  $(\text{OH}^-)$  ions. A formula of  $[\text{Sc}_3\text{O}(\text{BTC})_{1.45}(\text{OH})_{2.65}]$  was calculated and thus was also used for the determination of MIL-100(Sc) loading onto PBSAC spheres.

Table 3: Previously reported formula of MIL-100(Sc) and stoichiometry that was calculated in this work.

| Formula                                                             | Scandium % w/w |
|---------------------------------------------------------------------|----------------|
| $[\text{Sc}_3\text{O}(\text{BTC})_2(\text{OH})]$ (reported formula) | 23.2           |
| $[\text{Sc}_3\text{O}(\text{BTC})_{1.45}(\text{OH})_{2.65}]$        | 27.2           |

### 1.7.2 Calculation of MIL-100(Sc) loading onto PBSAC spheres

For MIL-100(Sc)@PBSAC composites (Figure 8 c) and PBSAC spheres (Figure 8 b), an average residual mass of  $4.05 \pm 0.80$  % and  $1.37 \pm 0.40$  % and was determined respectively (calculated using Equation 2). The residual mass of PBSAC was subtracted from the residual mass of MIL-100(Sc)@PBSAC composites which gave the amount of  $\text{Sc}_2\text{O}_3$  present in MIL-100(Sc)@PBSAC composite samples following framework decomposition. This value was then used to calculate the loading of scandium on PBSAC spheres (Equation 4).

$$\text{Sc loading (\% w/w)} = \frac{\text{Resid. mass MIL - 100(Sc)@PBSAC(\%)} - \text{Resid. mass PBSAC(\%)}}{100} \times 65.2$$

(Equation 4)

$$\text{Sc loading (\% w/w)} = \frac{4.05 (\%) - 1.37 (\%)}{100} \times 65.2 = 1.75\% \text{ w/w} \pm 0.52\% \text{ w/w} \quad (\text{Equation 5})$$

The MIL-100(Sc) loading was calculated assuming that the framework had the stoichiometry  $[\text{Sc}_3\text{O}(\text{BTC})_{1.45}(\text{OH})_{2.65}]$  (as determined in section 1.7.1) with a 27.2 % w/w scandium loading. The loading of MIL-100(Sc) onto PBSAC spheres was calculated to be 6.42% w/w  $\pm$  1.93%.

$$\text{MIL - 100(Sc) loading} \left( \frac{\text{w}}{\text{w}} \right) = \frac{1.75}{\left( \frac{27.2}{100} \right)} = 6.42\% \text{ w/w} \pm 1.93\% \text{ w/w} \quad (\text{Equation 6})$$

## 1.8 TGA derivative weight loss plot

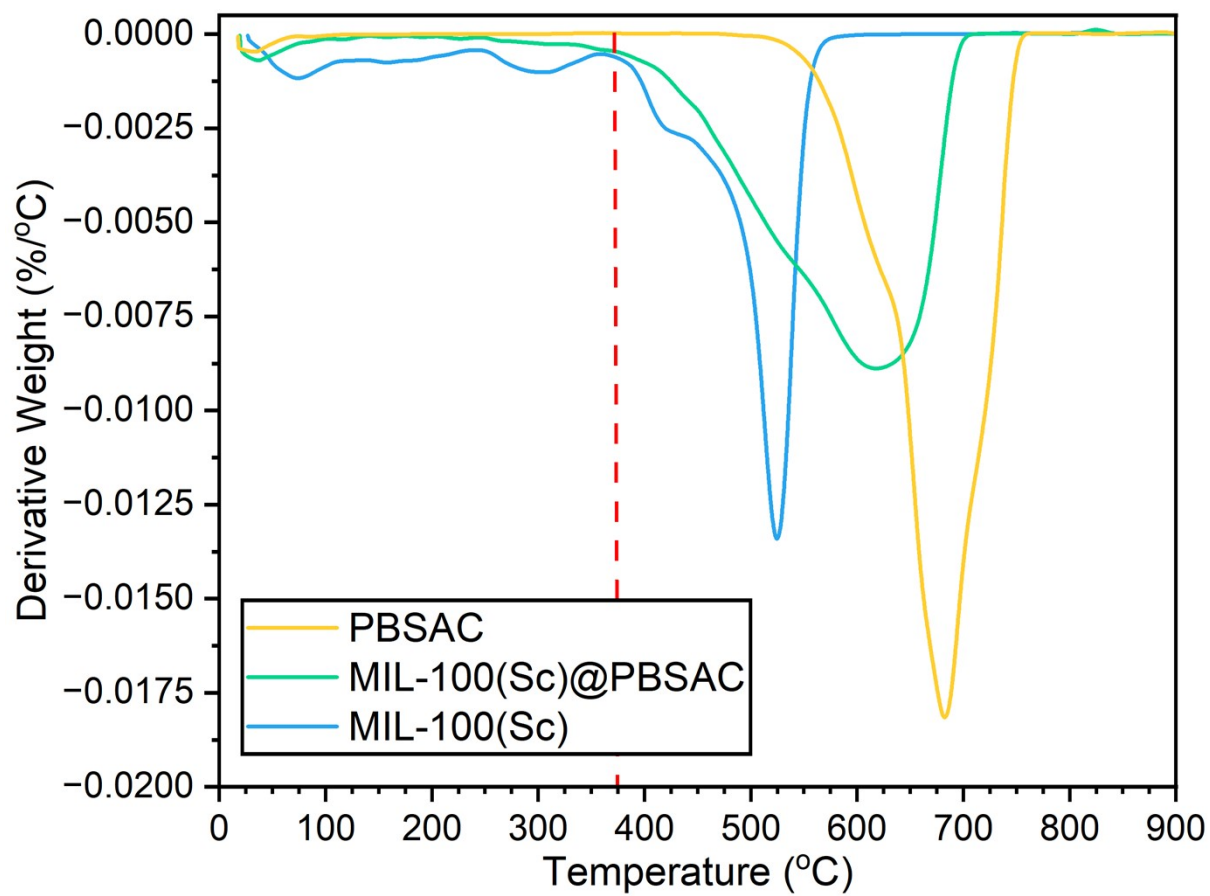

Figure SI 13: TGA derivative weight loss plot for PBSAC, MIL-100(Sc)@PBSAC and MIL-100(Sc). Material decomposition begins at a similar temperature ( $\approx 380$  °C).

## 1.9 Volume size distribution of PBSAC spheres

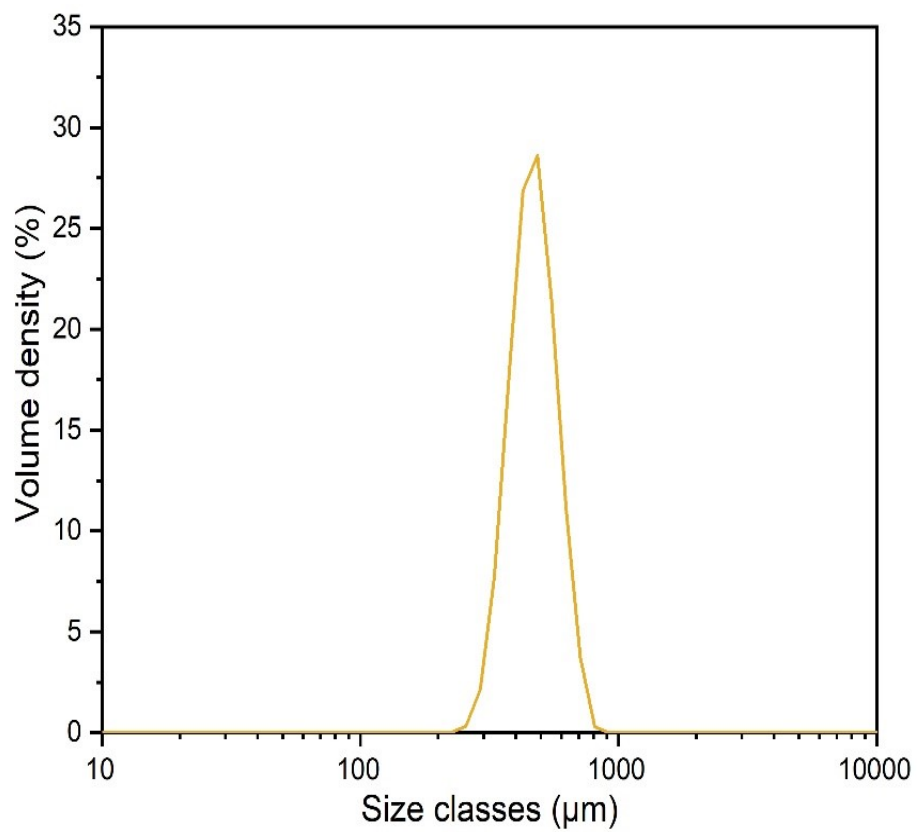

Figure SI 14: Volume distribution of PBSAC spheres obtained from Mastersizer 3000 laser diffraction analysis.

## 2.0 Calculation of reaction metrics

$$\text{Conversion (\%)} = \frac{[(\pm) - \text{Citronellal}]_0 (M) - [(\pm) - \text{Citronellal}]_t (M)}{[(\pm) - \text{Citronellal}]_0 (M)} \times 100$$

$[(\pm) - \text{Citronellal}]_0 = (\pm) - \text{Citronellal concentration at start of reaction}$

$[(\pm) - \text{Citronellal}]_t = (\pm) - \text{Citronellal concentration at a given time } t$

$$\text{Yield (\%)} = \frac{[(\pm) - \text{Isopulegols}]_t (M)}{[(\pm) - \text{Citronellal}]_0 (M)} \times 100$$

$[(\pm) - \text{Isopulegols}]_t = (\pm) - \text{Isopulegols concentration at a given time } t$

$[(\pm) - \text{Citronellal}]_0 = (\pm) - \text{Citronellal concentration at start of reaction}$

$$\text{Selectivity to isopulegols (\%)} = \frac{[(\pm) - \text{Isopulegols}]_t (M)}{[(\pm) - \text{Citronellal}]_0 (M) - [(\pm) - \text{Citronellal}]_t (M)} \times 100$$

$[(\pm) - \text{Isopulegols}]_t = (\pm) - \text{Isopulegols concentration at a given time } t$

$[(\pm) - \text{Citronellal}]_0 = (\pm) - \text{Citronellal concentration at start of reaction}$

$[(\pm) - \text{Citronellal}]_t = (\pm) - \text{Citronellal concentration at given time } t$

$$\text{Selectivity to isopulegol (\%)} = \frac{[(\pm) - \text{Isopulegol}]_t}{[(\pm) - \text{Isopulegols}]_t} \times 100$$

$[(\pm) - \text{Isopulegol}]_t = (\pm) - \text{Isopulegol concentration at a given time } t$

$[(\pm) - \text{Isopulegols}]_t = (\pm) - \text{Isopulegols concentration at a given time } t$

$$\text{Turnover number (TON)} = \frac{\text{moles of } (\pm) - \text{Isopulegols produced after } x \text{ time}}{\text{moles of scandium used for reaction}}$$

$$\text{Turnover Frequency (TOF) (hr}^{-1}\text{)} = \frac{\text{TON}}{\text{time (hr)}}$$



$$\text{Productivity (g hr}^{-1}\text{)} = \frac{\text{mass of } (\pm)\text{-Isopulegols produced after 1 hour (g)}}{\text{time (hr)}}$$

$$\text{Activity (mmol g}_{\text{cat}}^{-1}\text{hr}^{-1}\text{)} = \frac{\text{Average amount of } (\pm)\text{-citronellal converted (mmol)}}{\text{hour - on - stream (hr)} \times \text{gram of catalyst (g}_{\text{cat}}\text{)}}$$

## 2.1 Characterisation of MIL-100(Sc)@PBSAC after 26 hours on stream

### 2.1.1 Atomic absorption spectroscopy (AAS)

Table 4: Atomic absorption spectroscopy (AAS) data of fresh and used (26 hours time-on-stream) catalyst. A average 10.6 % loss of scandium was measured to have leached over the course of the reaction.

| Scandium loading – fresh catalyst sample (% w/w) | Scandium loading – Used catalyst samples (26 hours time-on-stream) (% w/w) | % loss of scandium over course of reaction |
|--------------------------------------------------|----------------------------------------------------------------------------|--------------------------------------------|
| $1.68 \pm 0.02$                                  | $1.50 \pm 0.03$                                                            | 7.5 – 13.6                                 |

### 2.1.2 Scanning electron microscopy–energy dispersive X-ray analysis (SEM-EDX)

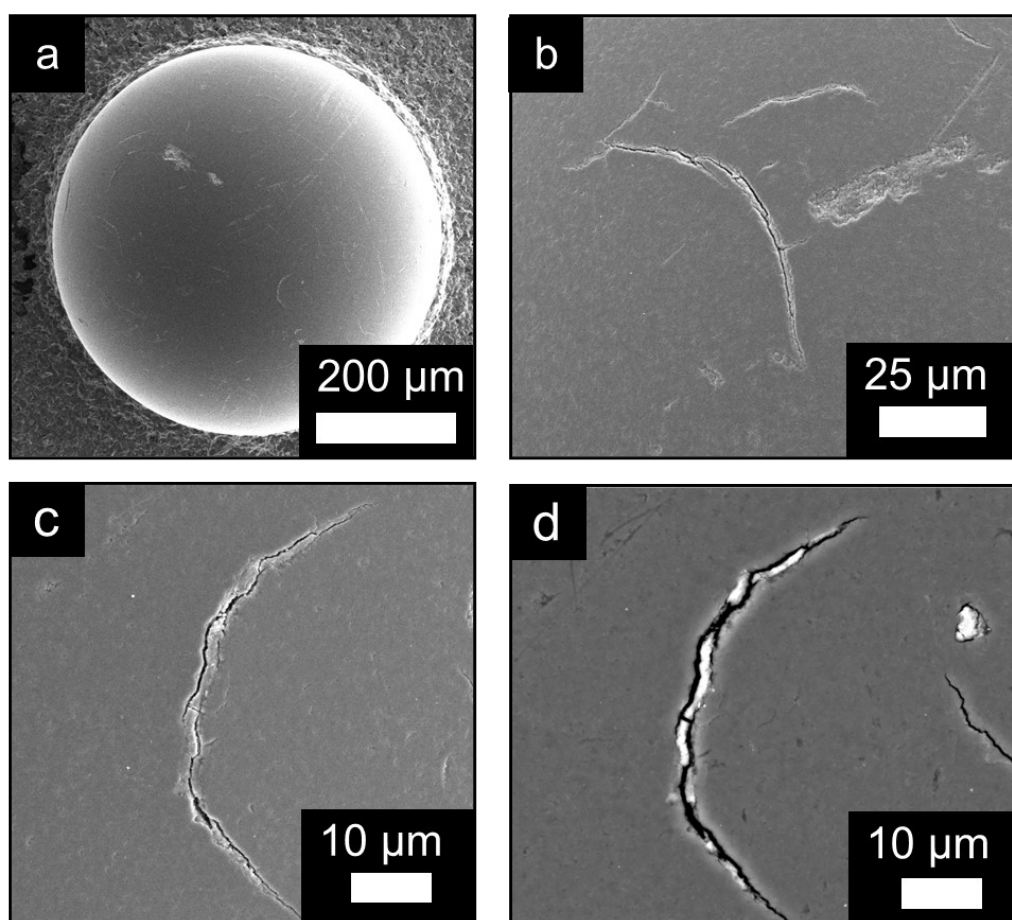

Figure SI 15: SEM images of MIL-100(Sc)@PBSAC after 26 hours on stream (a-c: detector: ETD, mode: SE; d: detector CBS, mode: all). The surface of the particle appears unchanged to MIL-100(Sc)@PBSAC spheres that have not been used for a reaction.

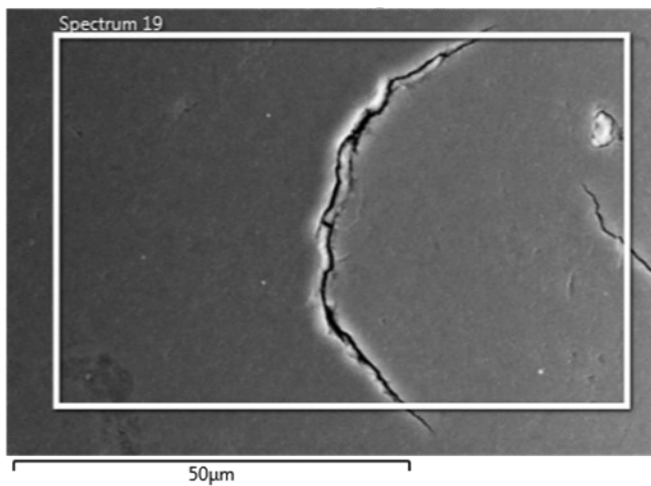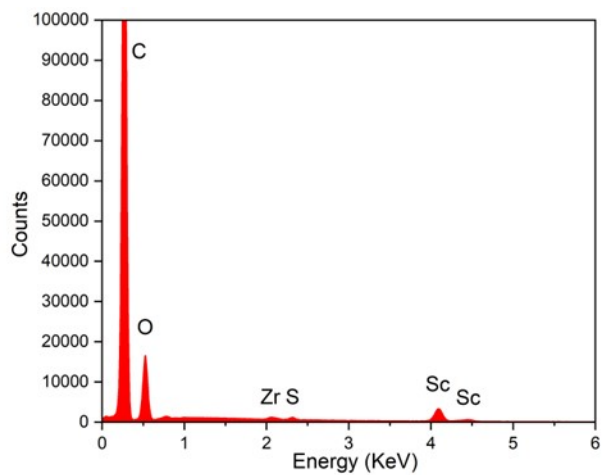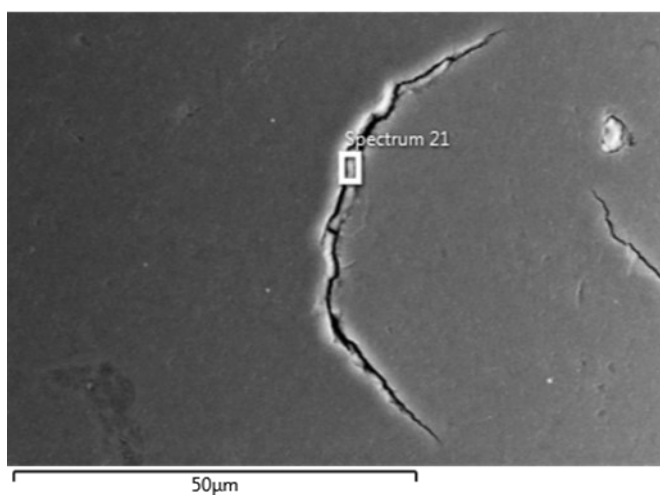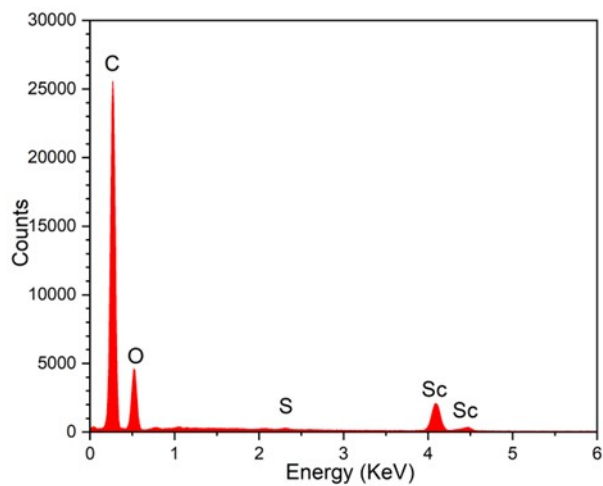

Figure SI 16: Left: SEM image of MIL-100(Sc)@PBSAC after 26 hours on stream. The labelled box in the images highlight where EDX spectra was obtained. Right: The resultant EDX spectra of the region stated. Zirconium is considered an impurity.
